# Supplementary material for: The role of vitamin D in reducing cancer risk and progression
Source: Springer Nature journal article supplement (doi:10.1038/nrc3691), 2014-04-04
Supplement: 41568_2014_BFnrc3691_MOESM7_ESM.pdf [file 41568_2014_BFnrc3691_MOESM7_ESM.pdf]

## Supplementary Information S3 | Tumor inhibitory effects of calcitriol and vitamin D in animal models

The multiple anti-cancer actions exerted by calcitriol, analogs or dietary vitamin D in rodent models of various cancers have been extensively reviewed<sup>1-5</sup>. The following is a summary of the salient findings described in the animal studies.

### **Inhibition of Cancer Initiation and Progression/Chemoprevention**

### **Reference**

#### ***Diet-induced hyperplasia***

Western style diets high in fat and low in vitamin D and calcium caused hyper-proliferation of anterior and dorsal prostate epithelial cells. [6]

Western style diets high in fat and low in vitamin D and calcium caused hyper-proliferation and hyperplasia in mouse mammary glands and prostate epithelial cells and this was suppressed by calcium and vitamin D supplementation. [7,8]

Western style diets low in vitamin D and calcium and high in fat induced colonic tumors in mice while feeding diets supplemented with calcium and vitamin D reduced tumor incidence and multiplicity. [9,10]

#### ***Chemical carcinogen-induced preneoplasia and cancer***

Dietary vitamin D supplementation decreased AZO-induced preneoplastic lesions in mouse colon in a dose-dependent manner. Dietary vitamin D concentrations correlated inversely with dysplasia score and maximum impact was seen when mice consumed more than 2500 IU/kg diet. [11]

Vitamin D administered prior to a carcinogenic insult (DMH) significantly reduced the incidence of colon adenocarcinomas in rats. [12]

Dietary vitamin D did not significantly alter incidence of colon carcinogenesis in rats when given after exposure to DMH. [13]

The vitamin D analog (24, 25-dihydroxyvitamin D<sub>3</sub>) diminished formation of aberrant crypt foci when administered before, after or along with DMH in rats. [14,15]

1 $\alpha$ (OH)D<sub>5</sub> decreased NMU-induced mammary tumor incidence and multiplicity in rats and AOM-induced aberrant crypt foci in mouse colon. However, in the DMBA-induced cancer model tumor progression was inhibited with no change in the incidence of mammary tumors. [16]

VDR ablation increased the susceptibility to DBMA-induced carcinogenesis in a tissue specific manner. Increased incidence of mammary gland hyperplasia with a higher percentage of hormone-independent tumors were observed in *Vdr* null mice. [17]

Gemini vitamin D analogs 0097 and 0072 inhibited NMU-induced mammary tumor burden in mice without causing hypercalcemia. [18]

#### ***Genetically engineered cancer models***

In Nkx3.1:Pten mice, a model that recapitulates the various stages of prostate cancer, calcitriol significantly reduced progression of prostatic intraepithelial neoplasia (PIN) to high grade-PIN when administered before the initial occurrence of these lesions. [19]

A vitamin D-deficient diet increased the proliferation and severity of PIN lesions in the anterior prostate of TgAPT<sub>121</sub> mice. [20]

*Rxr- $\alpha$*  null mice fed the new Western style diets high in fat and low in vitamin D and calcium developed high grade PIN. [21]

In LH overexpressing mice EB1089 decreased the proliferation of mammary epithelial cells in preneoplastic glands and reduced growth rate of hormone-induced tumors. [22]

MMTV-neu mice displaying haploinsufficiency of *Vdr* had shorter latency and increased incidence of mammary tumor formation. [23]

LPB-Tag model of prostate tumors progressed faster in *Vdr* null when compared to their wild-type littermates. [24]

The Gemini analog BXL0124 inhibited Erb2-positive mammary tumor growth in MMTV-Erb2/neu transgenic mice. [25]

Western diets low in calcium and vitamin D increased the number of polyps in the colons of APC<sup>1638N</sup> mice. [26]

Administration of a vitamin D<sub>2</sub> analog decreased tumor burden in APC<sup>Min/+</sup> mouse. [27]

25(OH)D<sub>3</sub> and two vitamin D analogs (NC and HP) failed to reduce tumor multiplicity or alter growth rates of colonic tumors in APC<sup>Pirc/+</sup> rats or APC<sup>Min/+</sup> mice. [28]

### **Tumor inhibitory effects in xenograft models of cancer**

#### **Single agents**

Gemini vitamin D analogs 0097 and BXL0124 inhibited growth of ER(-) MCF10DCIS cells implanted orthotopically into nude mice without causing hypercalcemia. [18,29]

Vitamin D<sub>2</sub> analog decreased the growth of HT-29 human colon cancer xenografts growth in mice but not SW-620 xenografts. [30]

EB1089 decreased growth of LNCaP human prostate cancer xenografts in nude mice. [31]

EB1089 dramatically reduced the growth of SUM-159PT human breast cancer xenografts and increased apoptosis. [32]

Vitamin D deficiency accelerated and Gemini analogs of vitamin D and a vitamin D-sufficient diet effectively reduced the growth of MC26 mouse colon xenografts. [33,34]

Diets low in vitamin D but with normal calcium levels increased the growth of DU145 prostate xenografts when compared to diets containing normal or high calcium with adequate vitamin D. [35]

Calcitriol and dietary vitamin D exhibited equivalent anti-cancer activity to inhibit the growth of MCF-7 human breast xenografts and PC3 human prostate xenografts in nude mice. [36]

#### **Combination Therapy**

Tumor volumes were significantly lower in animals irradiated after treatment with EB1089 than those that got radiation alone suggesting that vitamin D metabolites sensitized the tumor to radiation. [37]

Vitamin D analogs PRI 2202 and 2205 demonstrated significant inhibition of 4T1 mouse breast cancer xenografts when combined with cytostatics but not when administered individually. [38]

Calcitriol inhibited the growth of MCF-7 xenografts in a dose-dependent manner and combination with aromatase inhibitors further enhanced this effect, especially the regulation of the gene pathways contributing to the anti-cancer activity. [39]

Combination of dietary soy with calcitriol enhanced both anti-cancer activity as well as hypercalcemic toxicity in mice with PC3 xenografts. [40]

## **Inhibition of Metastasis**

EB1089 decreased total number of bone metastasis, mean surface area of osteolytic lesions and tumor burden in nude mice after intra-cardiac injections of MDA-MB-231 human breast cancer cells. [41]

Low vitamin D levels accelerated 4T1 mouse mammary tumor growth but did not affect metastasis to the Lungs. [42]

EB1089 exerted a strong inhibitory effect on PTHrP-enhanced C4-2 prostate cancer xenograft growth and metastasis to the bone. [43]

Vitamin D deficiency enhanced the growth of MDA-MB-231 breast cancer cells injected into the tibia of mice resulting in osteolytic lesions that appeared earlier and were larger than those seen in the vitamin D-sufficient mice. [44]

Vitamin D deficiency increased bone turnover, osteolytic lesions, total tumor area and total mitotic activity in nude mice receiving intra-tibial injections of PC3 prostate cancer cells. [45]

**Abbreviations:** AOM - azoxymethane; APC – adenomatous polyposis coli; AZO - azoxymethane; DCIS – ductal carcinoma in situ; DMBA – dimethylbenzanthracene; DMH – N,N'-dimethylhydrazine; LH – luteinising hormone; LPB-Tag - large probasin promoter directed SV40-large T-antigen; MMTV-ErbB2 – mouse mammary tumor virus – HER2/neu; NMU - N-methyl-N-nitrosourea; PIN – prostate intraepithelial neoplasia; PTHrP – parathyroid hormone related protein; RXR – retinoid x receptor; VDR – vitamin D receptor;

## **References**

1. Krishnan, A.V., Swami, S. & Feldman, D. Equivalent anticancer activities of dietary vitamin D and calcitriol in an animal model of breast cancer: importance of mammary CYP27B1 for treatment and prevention. *J Steroid Biochem Mol Biol* **136**, 289-95 (2013).
2. Mehta, R.G., Peng, X., Alimirah, F., Murillo, G. & Mehta, R. Vitamin D and breast cancer: Emerging concepts. *Cancer Lett* (2012).
3. Pereira, F., Larriba, M.J. & Munoz, A. Vitamin D and colon cancer. *Endocr Relat Cancer* **19**, R51-71 (2012).
4. Trump, D.L., Deeb, K.K. & Johnson, C.S. Vitamin D: considerations in the continued development as an agent for cancer prevention and therapy. *Cancer J* **16**, 1-9 (2010).
5. Welsh, J. Vitamin D and cancer: integration of cellular biology, molecular mechanisms and animal models. *Scand J Clin Lab Invest Suppl* **243**, 103-11 (2012).
6. Xue, L., Yang, K., Newmark, H. & Lipkin, M. Induced hyperproliferation in epithelial cells of mouse prostate by a Western-style diet. *Carcinogenesis* **18**, 995-9 (1997).
7. Kurihara, N., Fan, K., Thaler, H.T., Yang, K. & Lipkin, M. Effect of a Western-style diet fortified with increased calcium and vitamin D on mammary gland of C57BL/6 mice. *J Med Food* **11**, 201-6 (2008).
8. Xue, L., Lipkin, M., Newmark, H. & Wang, J. Influence of dietary calcium and vitamin D on diet-induced epithelial cell hyperproliferation in mice. *J Natl Cancer Inst* **91**, 176-81 (1999).
9. Newmark, H.L. et al. Western-style diet-induced colonic tumors and their modulation by calcium and vitamin D in C57BL/6 mice: a preclinical model for human sporadic colon cancer. *Carcinogenesis* **30**, 88-92 (2009).
10. Newmark, H.L. et al. A Western-style diet induces benign and malignant neoplasms in the colon of normal C57BL/6 mice. *Carcinogenesis* **22**, 1871-5 (2001).
11. Hummel, D.M. et al. Prevention of preneoplastic lesions by dietary vitamin D in a mouse model of colorectal carcinogenesis. *J Steroid Biochem Mol Biol* **136**, 284-8 (2013).
12. Belleli, A., Shany, S., Levy, J., Guberman, R. & Lamprecht, S.A. A protective role of 1,25-dihydroxyvitamin D3 in chemically induced rat colon carcinogenesis. *Carcinogenesis* **13**, 2293-8 (1992).

13. Comer, P.F., Clark, T.D. & Glauert, H.P. Effect of dietary vitamin D3 (cholecalciferol) on colon carcinogenesis induced by 1,2-dimethylhydrazine in male Fischer 344 rats. *Nutr Cancer* **19**, 113-24 (1993).
14. Salim, E.I. et al. Inhibition of development of N,N'-dimethylhydrazine-induced rat colonic aberrant crypt foci by pre, post and simultaneous treatments with 24R,25-dihydroxyvitamin D3. *Jpn J Cancer Res* **88**, 1052-62 (1997).
15. Taniyama, T. et al. Chemopreventive effect of 24R,25-dihydroxyvitamin D(3) in N, N'-dimethylhydrazine-induced rat colon carcinogenesis. *Carcinogenesis* **21**, 173-8 (2000).
16. Murillo, G. & Mehta, R.G. Chemoprevention of chemically-induced mammary and colon carcinogenesis by 1alpha-hydroxyvitamin D5. *J Steroid Biochem Mol Biol* **97**, 129-36 (2005).
17. Zinser, G.M., Suckow, M. & Welsh, J. Vitamin D receptor (VDR) ablation alters carcinogen-induced tumorigenesis in mammary gland, epidermis and lymphoid tissues. *J Steroid Biochem Mol Biol* **97**, 153-64 (2005).
18. Lee, H.J. et al. Gemini vitamin D analogues inhibit estrogen receptor-positive and estrogen receptor-negative mammary tumorigenesis without hypercalcemic toxicity. *Cancer Prev Res (Phila)* **1**, 476-84 (2008).
19. Banach-Petrosky, W. et al. Vitamin D inhibits the formation of prostatic intraepithelial neoplasia in Nkx3.1;Pten mutant mice. *Clin Cancer Res* **12**, 5895-901 (2006).
20. Kovalenko, P.L. et al. Dietary vitamin D and vitamin D receptor level modulate epithelial cell proliferation and apoptosis in the prostate. *Cancer Prev Res (Phila)* **4**, 1617-25 (2011).
21. Mao, G.E. et al. A joint effect of new Western diet and retinoid X receptor alpha prostate-specific knockout with development of high-grade prostatic intraepithelial neoplasia in mice--a preliminary study. *Prostate* **72**, 1052-9 (2012).
22. Milliken, E.L. et al. EB1089, a vitamin D receptor agonist, reduces proliferation and decreases tumor growth rate in a mouse model of hormone-induced mammary cancer. *Cancer Lett* **229**, 205-15 (2005).
23. Zinser, G.M. & Welsh, J. Vitamin D receptor status alters mammary gland morphology and tumorigenesis in MMTV-neu mice. *Carcinogenesis* **25**, 2361-72 (2004).
24. Mordan-McCombs, S. et al. Tumor progression in the LPB-Tag transgenic model of prostate cancer is altered by vitamin D receptor and serum testosterone status. *J Steroid Biochem Mol Biol* **121**, 368-71 (2010).
25. Lee, H.J. et al. Gemini vitamin D analog suppresses ErbB2-positive mammary tumor growth via inhibition of ErbB2/AKT/ERK signaling. *J Steroid Biochem Mol Biol* **121**, 408-12 (2010).
26. Yang, K. et al. Dietary modulation of carcinoma development in a mouse model for human familial adenomatous polyposis. *Cancer Res* **58**, 5713-7 (1998).
27. Huerta, S. et al. 1alpha,25-(OH)(2)-D(3) and its synthetic analogue decrease tumor load in the Apc(min) Mouse. *Cancer Res* **62**, 741-6 (2002).
28. Irving, A.A. et al. Supplementation by vitamin D compounds does not affect colonic tumor development in vitamin D sufficient murine models. *Arch Biochem Biophys* **515**, 64-71 (2011).
29. So, J.Y. et al. A novel Gemini vitamin D analog represses the expression of a stem cell marker CD44 in breast cancer. *Mol Pharmacol* **79**, 360-7 (2011).
30. Evans, S.R., Schwartz, A.M., Shchepotin, E.I., Uskokovic, M. & Shchepotin, I.B. Growth inhibitory effects of 1,25-dihydroxyvitamin D3 and its synthetic analogue, 1alpha,25-dihydroxy-16-ene-23yne-26,27-hexafluoro-19-nor-cholecalciferol (Ro 25-6760), on a human colon cancer xenograft. *Clin Cancer Res* **4**, 2869-76 (1998).
31. Blutt, S.E., Polek, T.C., Stewart, L.V., Kattan, M.W. & Weigel, N.L. A calcitriol analogue, EB1089, inhibits the growth of LNCaP tumors in nude mice. *Cancer Res* **60**, 779-82 (2000).
32. Flanagan, L. et al. Efficacy of Vitamin D compounds to modulate estrogen receptor negative breast cancer growth and invasion. *J Steroid Biochem Mol Biol* **84**, 181-92 (2003).
33. Spina, C. et al. Colon cancer and solar ultraviolet B radiation and prevention and treatment of colon cancer in mice with vitamin D and its Gemini analogs. *J Steroid Biochem Mol Biol* **97**, 111-20 (2005).

34. Tangpricha, V. et al. Vitamin D deficiency enhances the growth of MC-26 colon cancer xenografts in Balb/c mice. *J Nutr* **135**, 2350-4 (2005).
35. Ray, R. et al. Effect of dietary vitamin D and calcium on the growth of androgen-insensitive human prostate tumor in a murine model. *Anticancer Res* **32**, 727-31 (2012).
36. Swami, S. et al. Dietary vitamin D(3) and 1,25-dihydroxyvitamin D(3) (calcitriol) exhibit equivalent anticancer activity in mouse xenograft models of breast and prostate cancer. *Endocrinology* **153**, 2576-87 (2012).
37. Sundaram, S. et al. The combination of a potent vitamin D3 analog, EB 1089, with ionizing radiation reduces tumor growth and induces apoptosis of MCF-7 breast tumor xenografts in nude mice. *Clin Cancer Res* **9**, 2350-6 (2003).
38. Wietrzyk, J., Nevozhay, D., Filip, B., Milczarek, M. & Kutner, A. The antitumor effect of lowered doses of cytostatics combined with new analogs of vitamin D in mice. *Anticancer Res* **27**, 3387-98 (2007).
39. Swami, S. et al. Inhibitory effects of calcitriol on the growth of MCF-7 breast cancer xenografts in nude mice: selective modulation of aromatase expression in vivo. *Horm Cancer* **2**, 190-202 (2011).
40. Wang, J.Y., Swami, S., Krishnan, A.V. & Feldman, D. Combination of calcitriol and dietary soy exhibits enhanced anticancer activity and increased hypercalcemic toxicity in a mouse xenograft model of prostate cancer. *Prostate* **72**, 1628-37 (2012).
41. El Abdaimi, K. et al. The vitamin D analogue EB 1089 prevents skeletal metastasis and prolongs survival time in nude mice transplanted with human breast cancer cells. *Cancer Res* **60**, 4412-8 (2000).
42. Goldstein, B.D. & Kurt, R.A. Dietary vitamin D3 restriction influences tumor growth, but not the ability to generate an antigen-specific immune response in OTII transgenic mice. *Immunol Invest* **38**, 365-82 (2009).
43. Bhatia, V. et al. EB1089 inhibits the parathyroid hormone-related protein-enhanced bone metastasis and xenograft growth of human prostate cancer cells. *Mol Cancer Ther* **8**, 1787-98 (2009).
44. Ooi, L.L. et al. Vitamin D deficiency promotes human breast cancer growth in a murine model of bone metastasis. *Cancer Res* **70**, 1835-44 (2010).
45. Zheng, Y. et al. Vitamin D deficiency promotes prostate cancer growth in bone. *Prostate* **71**, 1012-21 (2011).
