# Supplementary figures and images for: The role of vitamin D in reducing cancer risk and progression
Source: Springer Nature journal article supplement (doi:10.1038/nrc3691), 2014-04-04

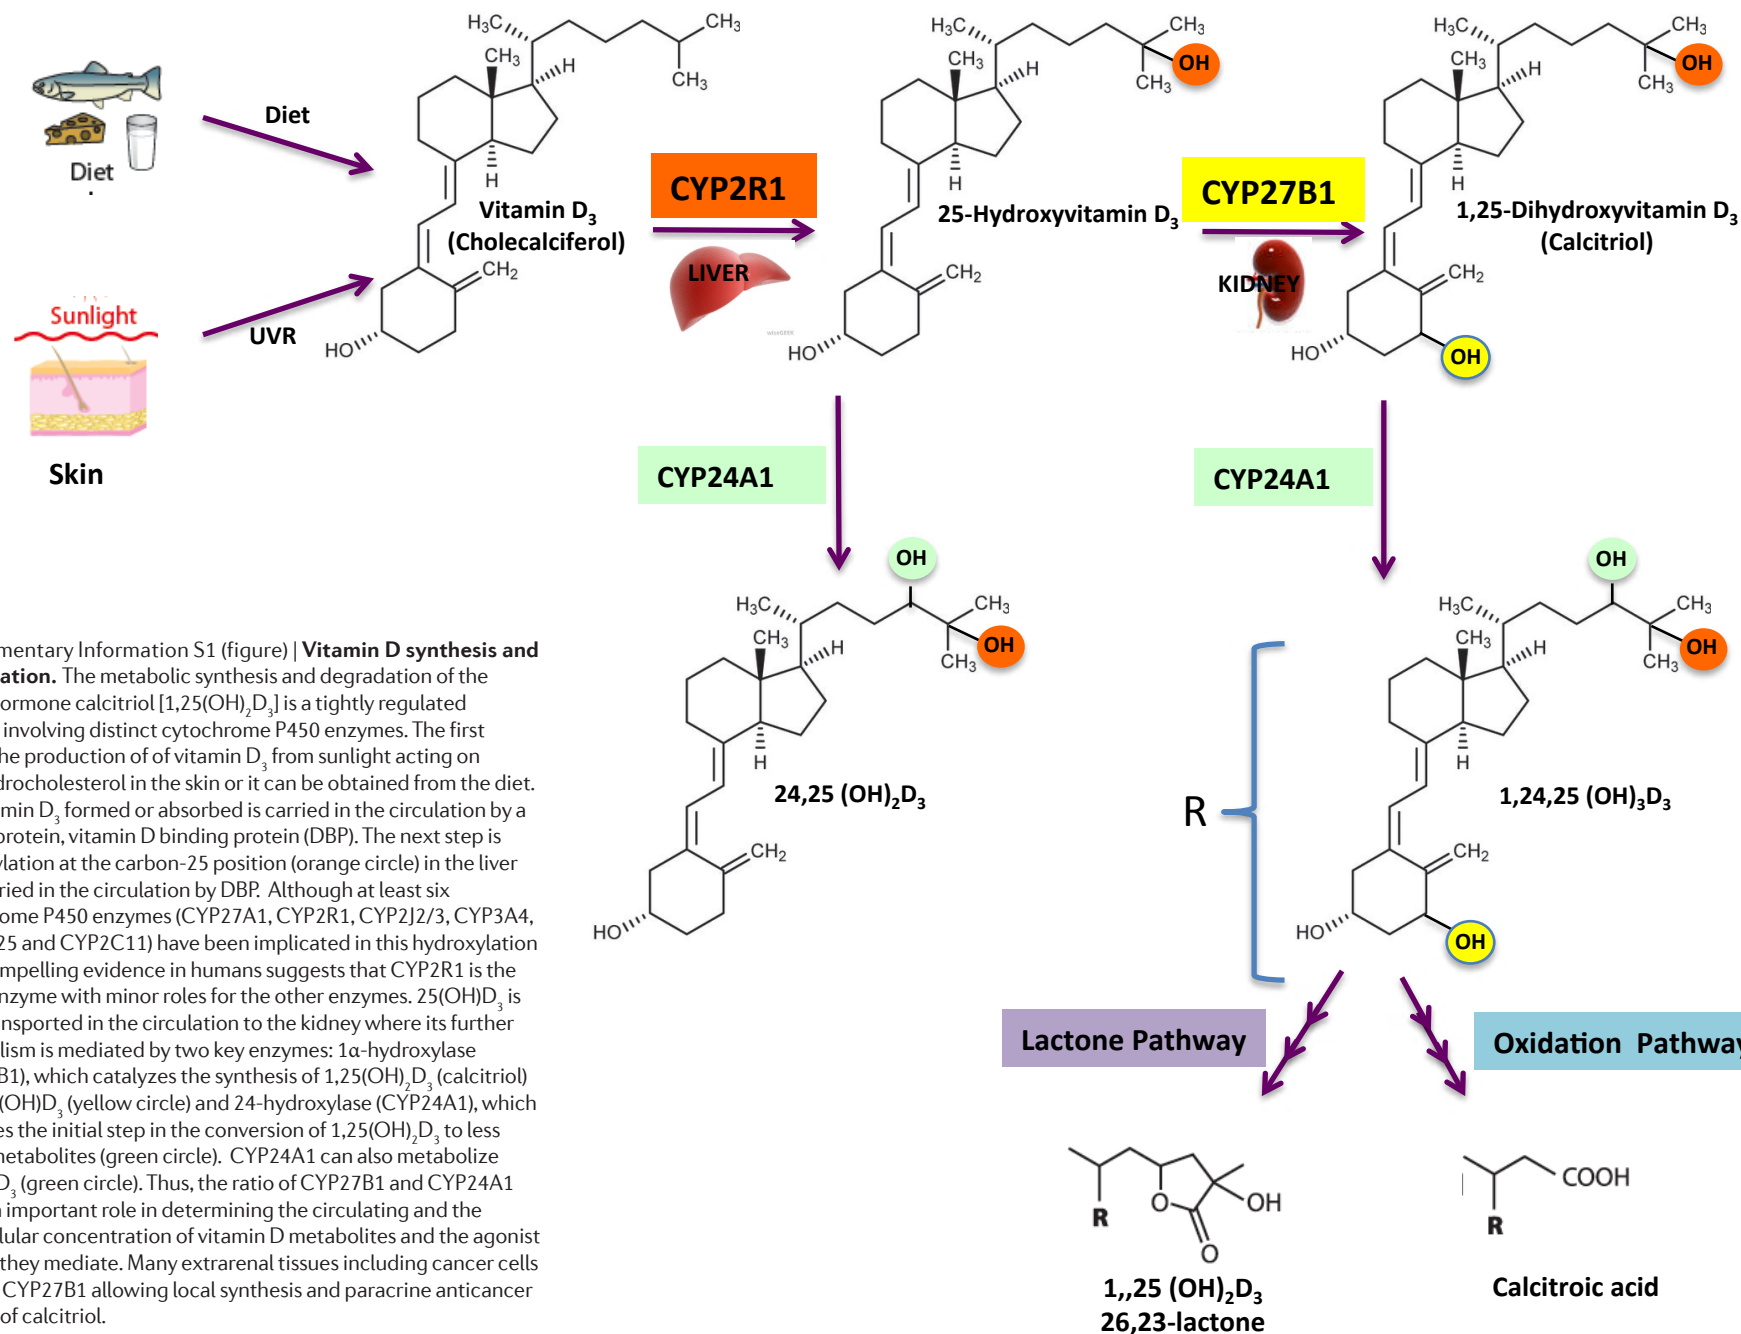

Supplement: 41568_2014_BFnrc3691_MOESM5_ESM.pdf [file 41568_2014_BFnrc3691_MOESM5_ESM.pdf]
